# Supplementary material for: N-hydroxypipecolic acid triggers systemic acquired resistance through extracellular NAD(P)
Source: PubMed Central journal article supplement (PMC10611778; doi:10.1038/s41467-023-42629-0), 2023-10-27
Supplement: 41467_2023_42629_MOESM4_ESM.pdf [file 41467_2023_42629_MOESM4_ESM.pdf]

## Description of Additional Supplementary Files

**Supplementary Data 1:** Differentially Expressed Genes (DEGs) in the Systemic Leaves of Wild-Type (WT) and *fin4-3* Plants at 48 hr after SAR Induction

**Supplementary Data 2:** SAR-Related DEGs in the Systemic Leaves of Wild-Type (WT) and *fin4-3* Plants at 48 hr after SAR Induction
